# Supplementary material for: Arabidopsis Seedling Lethal 1 Interacting With Plastid-Encoded RNA Polymerase Complex Proteins Is Essential for Chloroplast Development
Source: PubMed Central journal article supplement (PMC7772139; doi:10.3389/fpls.2020.602782), 2020-12-16
Supplement: Data_Sheet_1.pdf [file Data_Sheet_1.pdf]

## Supplementary Data:

5' sequence in *sl1*

|            |            |            |            |            |
|------------|------------|------------|------------|------------|
| CAGTACTAAA | ATCCAGATCC | CCCGAATTAA | TTCGGCGTTA | ATTCAGTACA |
| TTAAAAACGT | CCGCAATGTG | TTATTAAGTT | GTCTAAGCGT | CAATTTGTTT |
| ACACCACAAT | ATATCCTGAA | TAATTCAACA | AGAAGAATGT | CTCTTGAACA |
| ATGCAACAAG | AAGCTCTCTC | TTTCCTCTCG | TCCTCTCTCC | CTTCCCTTCA |
| CCACAATTTT | CCCTCTCTTT | CTCGCCTCCG | CTTCAACAAT | TTTCCCGCAC |
| TTTCCTTCAA | ACCAAACACT | TCATCATTAT | CTTCATCATT | TCTTCAAATC |

**Figure S1. Flanking sequences of the transfer DNA (T-DNA) insertion in the *sl1* mutant.**

Red, T-DNA insertion sequence; Black, genomic 5' UTR sequence; Gray, *SL1* CDS sequence.

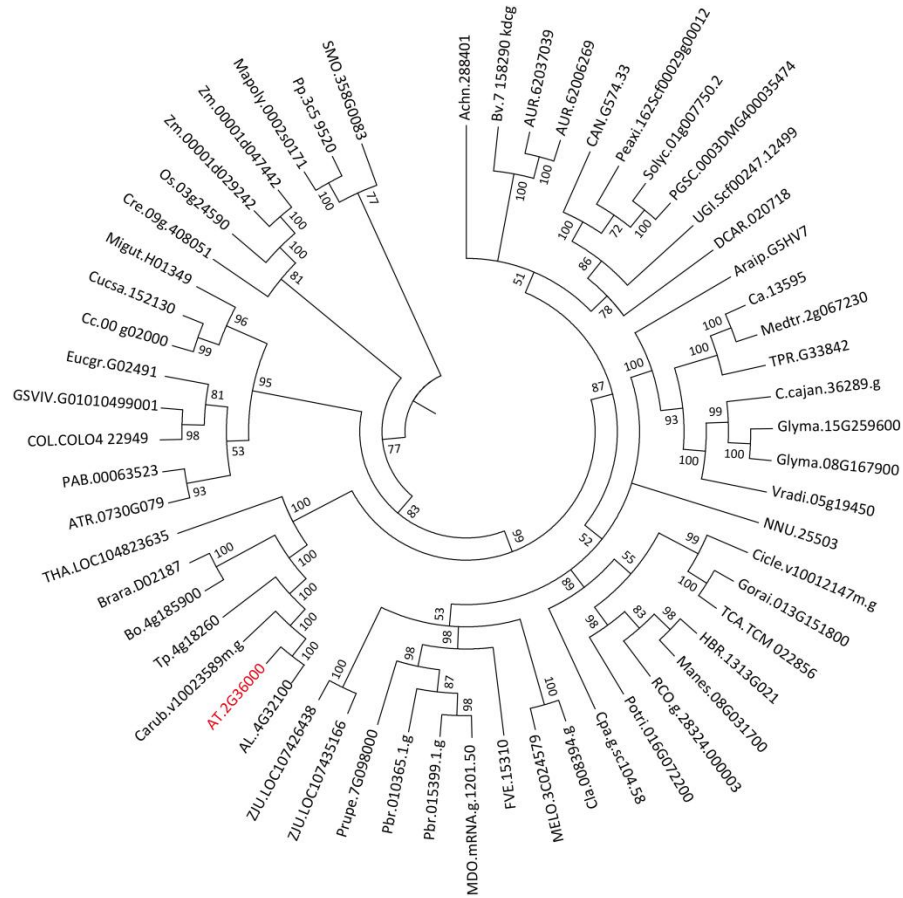

**Figure S2. Neighbor-joining phylogenetic tree of *SL1* ortholog genes in plants.**

Species abbreviations are Achn, *Actinidia chinensis*; ATR, *Amborella trichopoda*; AL, *Arabidopsis lyrata*; Araip, *Arachis ipaensis*; AT, *Arabidopsis thaliana*; Bv, *Beta vulgaris*; Bo, *Brassica oleracea*; Brara, *Brassica rapa*; C.cajan, *Cajanus cajan*; Carub, *Capsella rubella*; CAN, *Capsicum annuum*; Cpa, *Carica papaya*; AUR, *Chenopodium quinoa*; Cre, *Chlamydomonas reinhardtii*; Ca, *Cicer arietinum*; Cla, *Citrullus lanatus*; Cicle, *Citrus clementina*; Cc, *Coffea canephora*; COL, *Corchorus olitorius*; MELO, *Cucumis melo*; Cucsa, *Cucumis sativus L.*; DCAR, *Daucus carota*; Migut, *Erythranthe guttata*; Eucgr, *Eucalyptus grandis*; FVE, *Fragaria vesca*; Glyma, *Glycine max*; Gorai, *Gossypium raimondii*; HBR, *Hevea brasiliensis*; MDO, *Malus domestica*; Manes, *Manihot esculenta*; Mapoly, *Marchantia polymorpha*; Medtr, *Medicago truncatula*; NNU, *Nelumbo nucifera*; Os, *Oryza sativa ssp. japonica*; Peaxi, *Petunia axillaris*; Pp, *Physcomitrella patens*; PAB, *Picea abies*; Potri, *Populus trichocarpa*; Prupe, *Prunus persica*; Pbr, *Pyrus bretschneideri*; RCO, *Ricinus communis*; Tp, *Schrenkiella parvula*; SMO, *Selaginella moellendorffii*; Solyc, *Solanum lycopersicum*; PGSC, *Solanum tuberosum*; THA, *Tarenaya hassleriana*; TCA, *Theobroma cacao*; TPR, *Trifolium pratense*; UGI, *Utricularia gibba*; Vradi, *Vigna radiata var. radiata*; GSVIV, *Vitis vinifera*; Zm, *Zea*

*mays*; and ZJU, *Ziziphus jujuba*. Numbers on the nodes refer to bootstrap support values. Integrative orthologs data of *SL1* was from PLAZA.

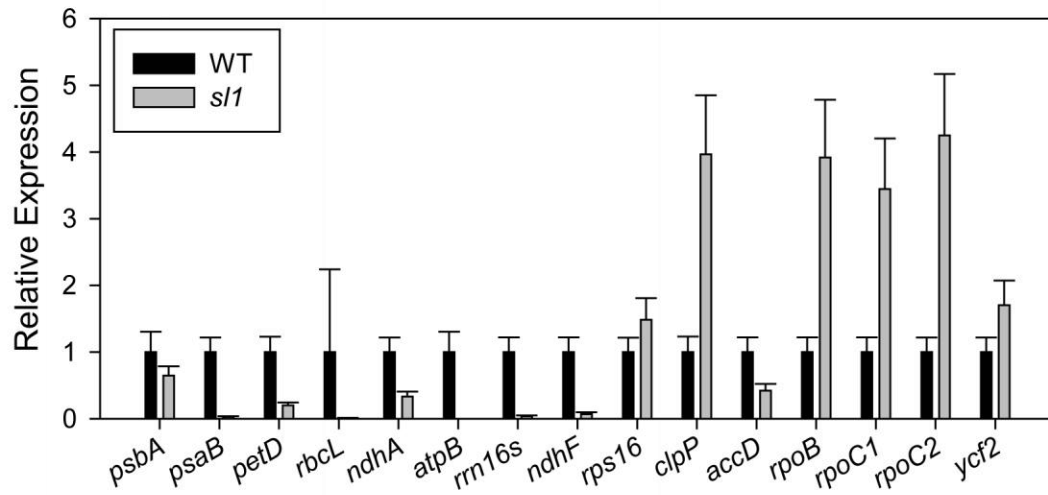

**Figure S3. Relative expression of plastid genome coding genes in WT and *s11* by relative quantification of RT-qPCR. Three independent biological replicates were performed.**

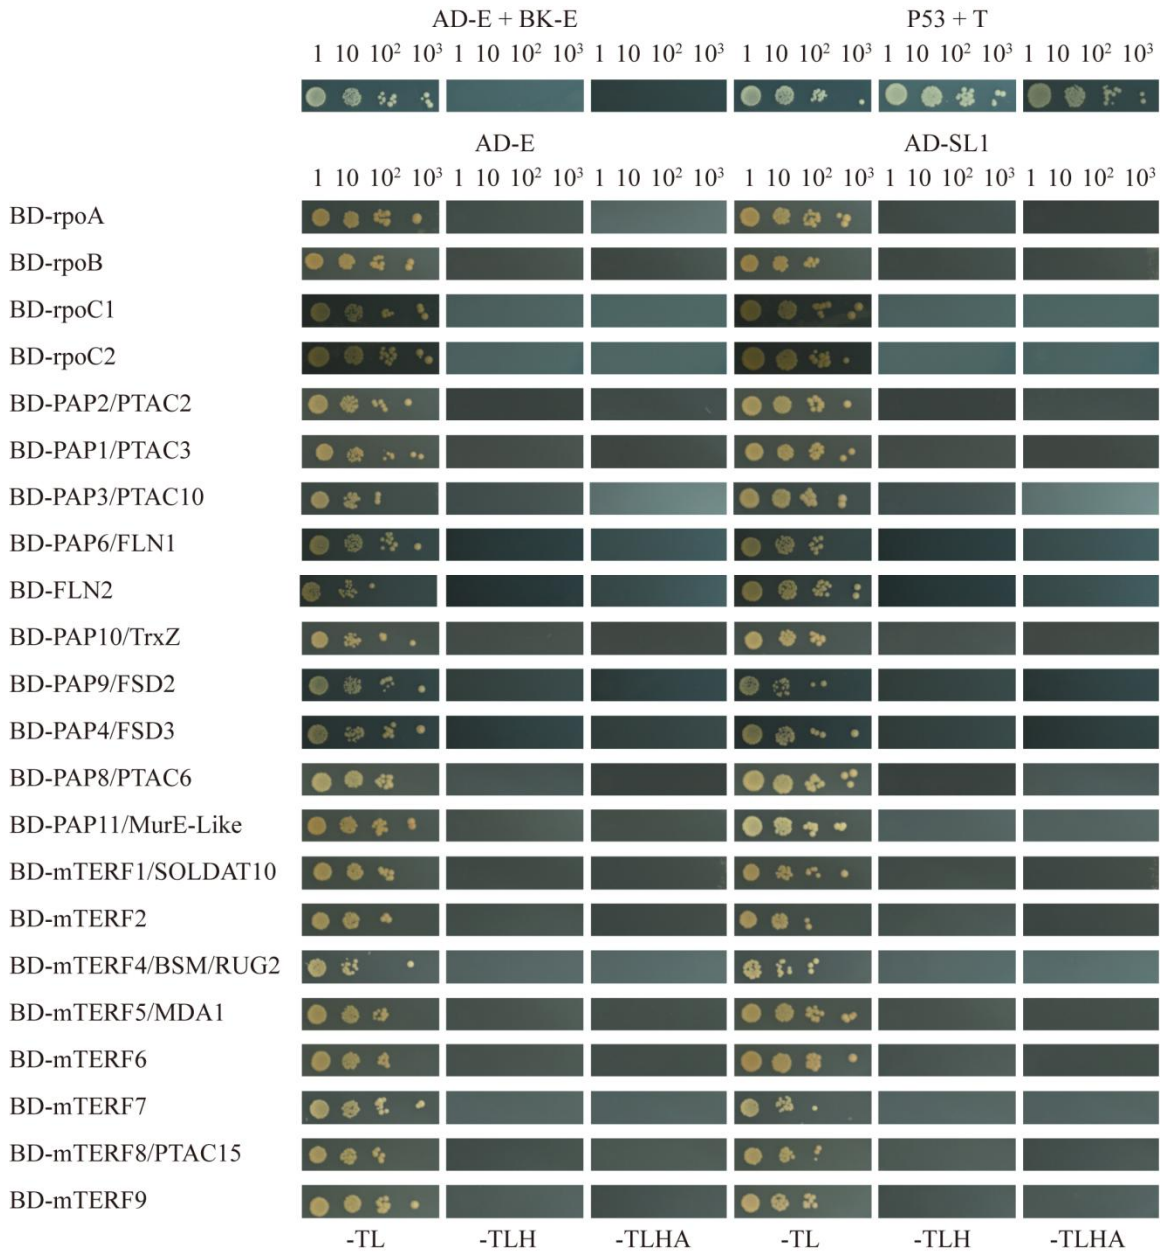

**Figure S4. Protein interaction screen of the PEP complex and mTERFs in the chloroplast by yeast two-hybrid assay.**

SL1 could interact with SL1, PAP12/PTAC7, PAP5/PTAC12, and PAP7/PTAC14 (**Figure 6B**), but no other PEP complex proteins, or other mTERF family proteins. The AD-E+BK-E was negative control, P53+T was positive control. Four independent biological replicates were performed.

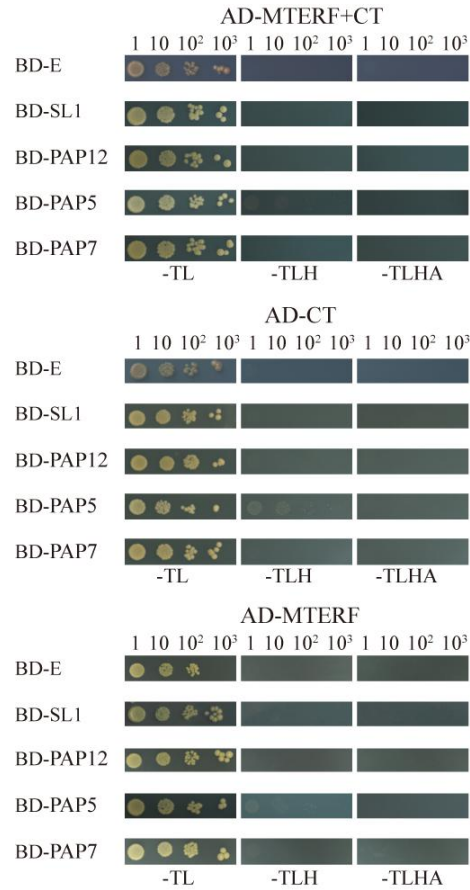

**Figure S5. The N-terminal part of the mature SL1 protein is essential for protein interactions.**

Yeast two-hybrid assay indicated the N-terminal part of SL1 (**Figure 6E**), but no other parts of SL1, could interact with SL1, PAP12/PTAC7, PAP5/PTAC12, and PAP7/PTAC14. Four independent biological replicates were performed.

**Table S1. Primers used in this study.**

| Names          | Primers                                                     |
|----------------|-------------------------------------------------------------|
| SL1-TDNA-F     | CCCTTCTCCTTCTCCAAAAATC                                      |
| SL1-TDNA-R     | GAGAGAGCGGTGGAGAGGAGAG                                      |
| SL1-TDNA-V     | AGTACTCGCCGATAGTGGAACCGACGC                                 |
| SL1-CDS-F      | ATGCAACAAGAAGCTCTCTCTTTC                                    |
| SL1-CDS-R      | AGAATCTTTTTGTACAGTAACAAGGC                                  |
| SL1-CDS-BP-F   | GGGGACAAGTTTGTACAAAAAAGCAGGCTAT<br>GCAACAAGAAGCTCTCTCTTTC   |
| SL1-CDS-BP-R   | GGGGACCACTTTGTACAAGAAAGCTGGGTAGA<br>ATCTTTTTGTACAGTAACAAGGC |
| SL1-qRT-F      | GATGGTGGAGATGGGGAGAGATG                                     |
| SL1-qRT-R      | AAAATGTAGGCAGAGGCTGGTTTC                                    |
| SL1-CDS-KPNI-F | GGGGTACCATGCAACAAGAAGCTCTCTCTTTC                            |
| SL1-CDS-SPEI-R | GGACTAGTAGAATCTTTTTGTACAGTAACAAG<br>GC                      |
| SL1-Promoter-F | ATATAGTTCATTTGTATCTTAG                                      |
| SL1-Promoter-R | ATGTGAGATGTCTCTTGAACA                                       |
| qRT-psbA-F     | GAGCAGCAATGAATGCGATA                                        |
| qRT-psbA-R     | CCTATGGGGTCGCTTCTGTA                                        |
| qRT-psaB-F     | GGACCCCACTACTCGTCGTA                                        |
| qRT-psaB-R     | ATTGCTAATTGCCCGAAATG                                        |
| qRT-petD-F     | TCCTTTTGCAACTCCTTTGG                                        |
| qRT-petD-R     | CCGCTGGTACTGAAACCATT                                        |
| qRT-rbcL-F     | GTGTTGGGTTCAAAGCTGGT                                        |
| qRT-rbcL-R     | CATCGGTCCACACAGTTGTC                                        |

|               |                                                         |
|---------------|---------------------------------------------------------|
| qRT-ndhA-F    | TGCAGGGATACAACAACGTATTG                                 |
| qRT-ndhA-R    | TCGGCTAGAGCTTGAAGAATTCC                                 |
| qRT-atpB-F    | CCGTTTCGTACAAGCAGGAT                                    |
| qRT-atpB-R    | CGGGGTCAGTCAAATCATCT                                    |
| qRT-clpP-F    | GTCGGAGGAGCAATTACCAA                                    |
| qRT-clpP-R    | GTGATGGTTTCGCGAAGTTT                                    |
| qRT-rrn16S-F  | CGGTATCTGGGGAATAAGCA                                    |
| qRT-rrn16S-R  | GATTTGACGGCGGACTTAAA                                    |
| qRT-ndhF-F    | CGGCGGGTATTTTTCTTGTA                                    |
| qRT-ndhF-R    | GGCTAAACCCCGCTTAATGT                                    |
| qRT-rps16-F   | AATCCTTGCAATTGATGTTCGA                                  |
| qRT-rps16-R   | GGATCATAAAAACCCACCTTACTAAGA                             |
| qRT-accD-F    | TGTGGATTCAATGCGACAAT                                    |
| qRT-accD-R    | TTTTGCGCAGAGTCAATACG                                    |
| qRT-rpoB-F    | AAAAAGCACGGATACGGATG                                    |
| qRT-rpoB-R    | CTTCTTGAATGCCCCGATTA                                    |
| qRT-rpoC1-F   | TCGGATACGAAGATATCAAATGG                                 |
| qRT-rpoC1-R   | TTAGTTATGGGCCTAGCAAAAGA                                 |
| qRT-rpoC2-F   | CCATTTTCCGGACAAGACAGA                                   |
| qRT-rpoC2-R   | CTCTTCCTGGCGGTATCAAGA                                   |
| qRT-ycf2.1-F  | TCCGCAAGGGCCATGAT                                       |
| qRT-ycf2.1-R  | GCTGTCCCGAATTCAAGTTGA                                   |
| qRT-Actin2-F  | GGTAACATTGTGCTCAGTGGTGG                                 |
| qRT-Actin2-R  | CTCGGCCTTGGAGATCCACATC                                  |
| Y2H-RPOA-BP-F | GGGGACAAGTTTGTACAAAAAAGCAGGCTCTA<br>TGGTTCGAGAGAAAGTCAA |



|                 |                                                                     |
|-----------------|---------------------------------------------------------------------|
| Y2H-RPOA-BP-R   | GGGGACCACTTTGTACAAGAAAGCTGGGTATT<br>TTTTTTCTAGAATGTCTAATATCTT       |
| Y2H-RPOB-BP-F   | GGGGACAAGTTTGTACAAAAAAGCAGGCTCTA<br>TGCTTGGGGATGAAAAAGAGGGA         |
| Y2H-RPOB-BP-R   | GGGGACCACTTTGTACAAGAAAGCTGGGTAAA<br>CTTCCTTCCTATTAATCTGGAAATTCTTCTC |
| Y2H-RPOC1-BP-F  | GGGGACAAGTTTGTACAAAAAAGCAGGCTCTA<br>TGATCGATCGGTATAAACATCAA         |
| Y2H-RPOC1-BP-R  | GGGGACCACTTTGTACAAGAAAGCTGGGTAGG<br>TATCATATGAACAGGCTTGAGAA         |
| Y2H-RPOC2-BP-F  | GGGGACAAGTTTGTACAAAAAAGCAGGCTCTA<br>TGCGGGAACGGGCCAATC              |
| Y2H-RPOC2-BP-R  | GGGGACCACTTTGTACAAGAAAGCTGGGTAAA<br>TCCTAGAAAAGTCAGATTTGGAAATAGAAG  |
| Y2H-PTAC2-BP-F  | GGGGACAAGTTTGTACAAAAAAGCAGGCTCTA<br>TGAACCTAGCAATTCCAAATCC          |
| Y2H-PTAC2-BP-R  | GGGGACCACTTTGTACAAGAAAGCTGGGTAAAG<br>CTGTGCTCCCTGCTAGTT             |
| Y2H-PTAC3-BP-F  | GGGGACAAGTTTGTACAAAAAAGCAGGCTCTA<br>TGTCACTCTTGTTCCCTCAATCCTCC      |
| Y2H-PTAC3-BP-R  | GGGGACCACTTTGTACAAGAAAGCTGGGTAAAG<br>AGCTTACTGTTGATGCTGGCT          |
| Y2H-PTAC7-BP-F  | GGGGACAAGTTTGTACAAAAAAGCAGGCTCTA<br>TGGCTTCCTTCACCTGTTCT            |
| Y2H-PTAC7-BP-R  | GGGGACCACTTTGTACAAGAAAGCTGGGTAAAG<br>TGTAGTACTCCAACAAATAGCCAG       |
| Y2H-PTAC10-BP-F | GGGGACAAGTTTGTACAAAAAAGCAGGCTCTA<br>TGCAGATTTGCCAAACCAA             |
| Y2H-PTAC10-BP-R | GGGGACCACTTTGTACAAGAAAGCTGGGTAGT<br>CTGTCAAGACTTGAGTACCGTTA         |

|                 |                                                                   |
|-----------------|-------------------------------------------------------------------|
| Y2H-PTAC12-BP-F | GGGGACAAGTTTGTACAAAAAAGCAGGCTCTA<br>TGGCGTCAATATCAACCAC           |
| Y2H-PTAC12-BP-R | GGGGACCACTTTGTACAAGAAAGCTGGGTAAG<br>GATCAGTCTCCTCTTCAAAG          |
| Y2H-PTAC14-BP-F | GGGGACAAGTTTGTACAAAAAAGCAGGCTCTA<br>TGGCTTCTTCAGTCTCTCTTCAGT      |
| Y2H-PTAC14-BP-R | GGGGACCACTTTGTACAAGAAAGCTGGGTAAT<br>AGAGTAACCGTTCTTGATAGATGTCAAGT |
| Y2H-FLN1-NDEI-F | GGAATTCCATATGATGGCTTCACTTCTTATTTT<br>CCCCC                        |
| Y2H-FLN1-XMAI-R | CCCCCGGGCTACCACATTGATGGAACATAAA<br>CTTGTTT                        |
| Y2H-FLN2-NDEI-F | GGAATTCCATATGATGGCGTCTCTCTCCTTCAC<br>C                            |
| Y2H-FLN2-XMAI-R | CCCCCGGGTCATAAACTACCATCTTCAAACA<br>TTGAGCCA                       |
| Y2H-TrxZ-BP-F   | GGGGACAAGTTTGTACAAAAAAGCAGGCTCTA<br>TGGCTCTTGTTCAATCCAGA          |
| Y2H-TrxZ-BP-R   | GGGGACCACTTTGTACAAGAAAGCTGGGTACA<br>TCTCGTTGTCAATGATATCGT         |
| Y2H-FSD2-BP-F   | GGGGACAAGTTTGTACAAAAAAGCAGGCTCTA<br>TGATGAATGTTGCAGTGACAG         |
| Y2H-FSD2-BP-R   | GGGGACCACTTTGTACAAGAAAGCTGGGTAGT<br>CAACCTCAGATACATCGATGTC        |
| Y2H-FSD3-BP-F   | GGGGACAAGTTTGTACAAAAAAGCAGGCTCTA<br>TGAGTTCTTGTGTTGTGACGAC        |
| Y2H-FSD3-BP-R   | GGGGACCACTTTGTACAAGAAAGCTGGGTAAG<br>CGATTGGGATGTTGG               |
| Y2H-PTAC6-BP-F  | GGGGACAAGTTTGTACAAAAAAGCAGGCTCTA<br>TGGCGTCTTCCGCCG               |

|                     |                                                                |
|---------------------|----------------------------------------------------------------|
| Y2H-PTAC6-BP-R      | GGGGACCACTTTGTACAAGAAAGCTGGGTAGA<br>GACTTCAGTGTCTCAAATTGGTTC   |
| Y2H-MURE_LIKE-BP-F  | GGGGACAAGTTTGTACAAAAAAGCAGGCTCTA<br>TGGCGTTCACCTTTCTCTCT       |
| Y2H-MURE_LIKE-BP-R  | GGGGACCACTTTGTACAAGAAAGCTGGGTAAT<br>GACTCTCTGGTAACCGCC         |
| Y2H-PP01-BP-F       | GGGGACAAGTTTGTACAAAAAAGCAGGCTCTA<br>TGGAGTTATCTCTTCTCCGTCC     |
| Y2H-PP01-BP-R       | GGGGACCACTTTGTACAAGAAAGCTGGGTACT<br>TGTAAGCGTACCGTGACATG       |
| Y2H-MTERF1-BP-F     | GGGGACAAGTTTGTACAAAAAAGCAGGCTCTA<br>TGATAGCAAGGTGTTCTCTTTTTCCG |
| Y2H-MTERF1-BP-R     | GGGGACCACTTTGTACAAGAAAGCTGGGTATC<br>TTCTTTCAGCAGACCTAAGACG     |
| Y2H-MTERF2-BP-F     | GGGGACAAGTTTGTACAAAAAAGCAGGCTCTA<br>TGCTTCTCCACTGCAACGT        |
| Y2H-MTERF2-BP-R     | GGGGACCACTTTGTACAAGAAAGCTGGGTATT<br>CTGTCAAATCCTCTTCTTCTTCCG   |
| Y2H-MTERF4/BSM-BP-F | GGGGACAAGTTTGTACAAAAAAGCAGGCTCTA<br>TGAAGATTAGGTTCTGTAATGGCTT  |
| Y2H-MTERF4/BSM-BP-R | GGGGACCACTTTGTACAAGAAAGCTGGGTATG<br>CAAACCTCCTCGTCGTCATCATC    |
| Y2H-MTERF5-BP-F     | GGGGACAAGTTTGTACAAAAAAGCAGGCTCTA<br>TGCAAAGTCTTAGTCAACTTGGACC  |
| Y2H-MTERF5-BP-R     | GGGGACCACTTTGTACAAGAAAGCTGGGTACA<br>ACAAACCACCACTACTTTGTTTCAG  |
| Y2H-MTERF6-BP-F     | GGGGACAAGTTTGTACAAAAAAGCAGGCTCTA<br>TGGAGGTGACAAATACGAGCAG     |
| Y2H-MTERF6-BP-R     | GGGGACCACTTTGTACAAGAAAGCTGGGTAAA<br>TGTGACCTTTGACTAGGGGC       |

|                 |                                                                   |
|-----------------|-------------------------------------------------------------------|
| Y2H-MTERF7-BP-F | GGGGACAAGTTTGTACAAAAAAGCAGGCTCTA<br>TGGCGGTCGCAATACCTC            |
| Y2H-MTERF7-BP-R | GGGGACCACTTTGTACAAGAAAGCTGGGTAGA<br>GTTTGGTGCATCCTAGATACAGATTC    |
| Y2H-MTERF8-BP-F | GGGGACAAGTTTGTACAAAAAAGCAGGCTCTA<br>TGGTGATCTTATCTCTCGTCTCTTGT    |
| Y2H-MTERF8-BP-R | GGGGACCACTTTGTACAAGAAAGCTGGGTATA<br>AACAAATCATTTTCGATATTATCAGCCGC |
| Y2H-MTERF9-BP-F | GGGGACAAGTTTGTACAAAAAAGCAGGCTCTA<br>TGGCGGGTTTCTCACTGTACT         |
| Y2H-MTERF9-BP-R | GGGGACCACTTTGTACAAGAAAGCTGGGTATC<br>CTCTCTTGTCATACTTGTTTGCAAAC    |
| PD-SL1-BP-F     | GGGGACAAGTTTGTACAAAAAAGCAGGCTCTC<br>TCTCCTCCACCACAACAAC           |
| PD-SL1-BP-R     | GGGGACCACTTTGTACAAGAAAGCTGGGTATC<br>AAGAATCTTTTTGTACAGTAACAA      |
| PD-PTAC7-BP-F   | GGGGACAAGTTTGTACAAAAAAGCAGGCTCTT<br>GTGGGATTCAGAGAGATGA           |
| PD-PTAC7-BP-R   | GGGGACCACTTTGTACAAGAAAGCTGGGTCAA<br>GTGTAGTACTCCAACAAATAGC        |
| PD-PTAC12-BP-F  | GGGGACAAGTTTGTACAAAAAAGCAGGCTGC<br>ACAGACAGTGGAAAGTCCA            |
| PD-PTAC12-BP-R  | GGGGACCACTTTGTACAAGAAAGCTGGGTAA<br>GGATCAGTCTCCTCTTCAA            |
| PD-PTAC14-BP-F  | GGGGACAAGTTTGTACAAAAAAGCAGGCTCTG<br>CTTCCGAAGAATCTTCC             |
| PD-PTAC14-BP-R  | GGGGACCACTTTGTACAAGAAAGCTGGGTCAA<br>TAGAGTAACCGTTCTTGATAGA        |
| Y2H-SL1-NT-BP-F | GGGGACAAGTTTGTACAAAAAAGCAGGCTCTC<br>TCTCCTCCACCACAACAACAAC        |

|                    |                                                                     |
|--------------------|---------------------------------------------------------------------|
| Y2H-SL1-NT-BP-R    | GGGGACCACTTTGTACAAGAAAGCTGGGTATG<br>GGATTGTGTGTGAGGTAAAGGT          |
| Y2H-SL1-MTERF-BP-F | GGGGACAAGTTTGTACAAAAAAGCAGGCTCTG<br>TCATCACTTTCCTCCTCCGTG           |
| Y2H-SL1-MTERF-BP-R | GGGGACCACTTTGTACAAGAAAGCTGGGTATC<br>TAAAACCAGCTTCATTAGTCTTCAACATCAC |
| Y2H-SL1-CT-BP-F    | GGGGACAAGTTTGTACAAAAAAGCAGGCTCTG<br>ATACATTGGAGGTATGTTGT            |
| Y2H-SL1-CT-BP-R    | GGGGACCACTTTGTACAAGAAAGCTGGGTAAG<br>AATCTTTTTGTACAGTAACAA           |
| Y2H-SL1-CTP-BP-F   | GGGGACAAGTTTGTACAAAAAAGCAGGCTCTA<br>TGCAACAAGAAGCTCTCTCTTTCC        |
| Y2H-SL1-CTP-BP-R   | GGGGACCACTTTGTACAAGAAAGCTGGGTAAG<br>AGGGTATATCTGGGGATTTGAAG         |

---

**Table S2. Expression of plastid genome coding genes in WT, *sII* and complemented line (Com) by absolute quantification of droplet digital PCR (ddPCR).**

| Gene ID       | copies/ $\mu$ L |            |         |
|---------------|-----------------|------------|---------|
|               | WT              | <i>sII</i> | Com     |
| <i>ACTIN</i>  | 78600           | 11380      | 9500    |
| <i>psbA</i>   | 1912000         | 47900      | 951000  |
| <i>psaB</i>   | 253900          | 12000      | 45600   |
| <i>petD</i>   | 104800          | 1080       | 12000   |
| <i>rbcL</i>   | 1342000         | 42100      | 236000  |
| <i>ndhA</i>   | 38600           | 1500       | 8470    |
| <i>atpB</i>   | 95000           | 6420       | 23600   |
| <i>clpP</i>   | 31500           | 9350       | 7180    |
| <i>rrn16s</i> | 61500000        | 1770000    | 8750000 |
| <i>ndhF</i>   | 9670            | 520        | 1110    |
| <i>rps16</i>  | 8170            | 820        | 250     |
| <i>accD</i>   | 8760            | 95         | 390     |
| <i>rpoB</i>   | 5780            | 1800       | 970     |
| <i>rpoC1</i>  | 12820           | 2210       | 810     |
| <i>rpoC2</i>  | 13510           | 4080       | 1190    |
| <i>ycf2.1</i> | 9030            | 1080       | 690     |
